# Supplementary material for: Promoting CO2 electroreduction to CO by a graphdiyne-stabilized Au nanoparticle catalyst
Source: Royal Society of Chemistry journal article supplement (doi:10.1039/d3dt03432a), 2023-11-23
Supplement: d3dt03432a1.pdf [file d3dt03432a1.pdf]

## Supporting Information

### **Promoting CO<sub>2</sub> electroreduction to CO by a graphdiyne stabilized Au nanoparticles catalyst**

Guodong Shi,<sup>\*a</sup> De Guo,<sup>c</sup> Jun-Tao Wang,<sup>a</sup> Yanwei Luo,<sup>a</sup> Zhiwei Hou,<sup>a</sup> Zixiong Fan,<sup>b</sup> Mei Wang<sup>\*c</sup> and Mingjian Yuan<sup>b</sup>

<sup>a</sup> College of Science, Henan University of Technology, Zhengzhou 450001 (China)

<sup>b</sup> Key Lab of Advanced Energy Materials Chemistry (Ministry of Education), Nankai University, Tianjin 300071, (China)

<sup>c</sup> School of Materials Science and Engineering, Institute for New Energy Materials & Low Carbon Technologies, Tianjin University of Technology, Tianjin 300384, (China)

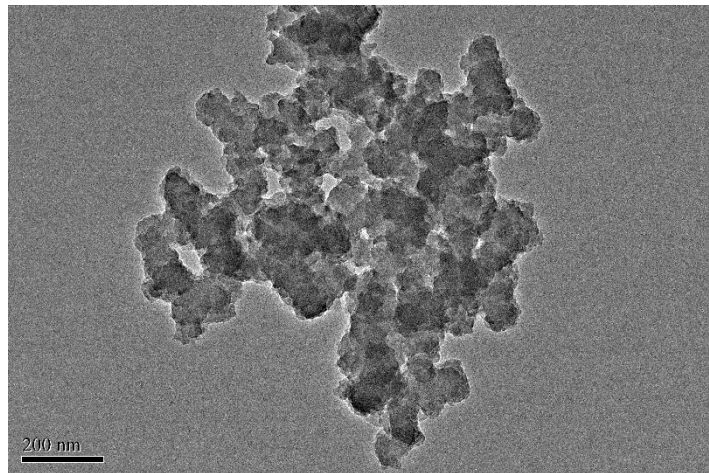

Figure S1. TEM image of GDY.

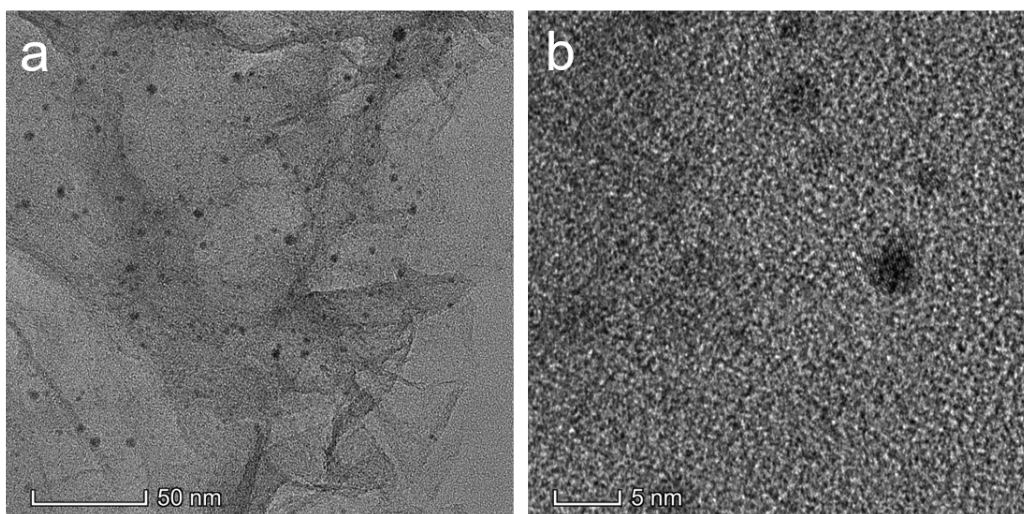

Figure S2. (a)TEM and (b) HRTEM images of Au/GO composite.

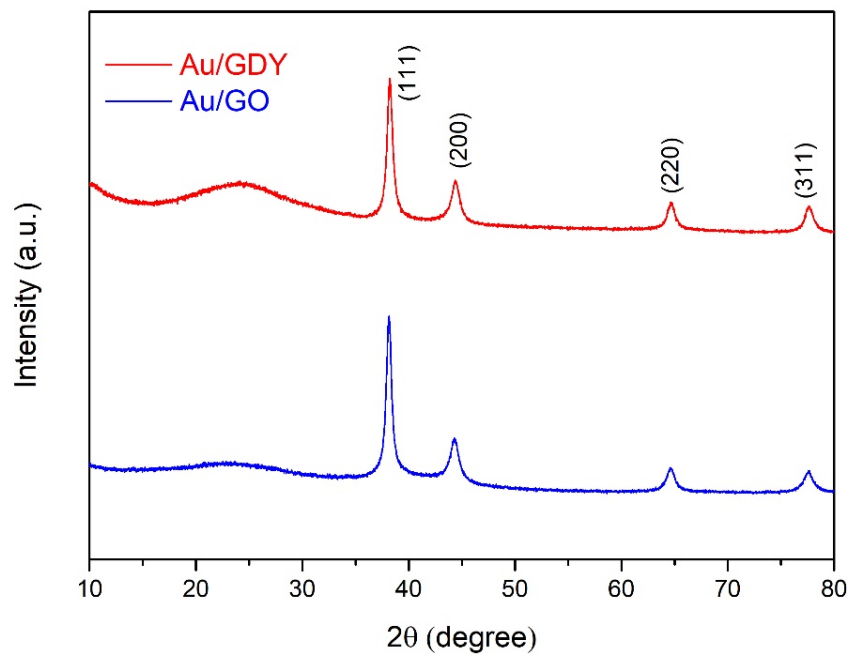

Figure S3. XRD patterns for Au/GDY and Au/GO.

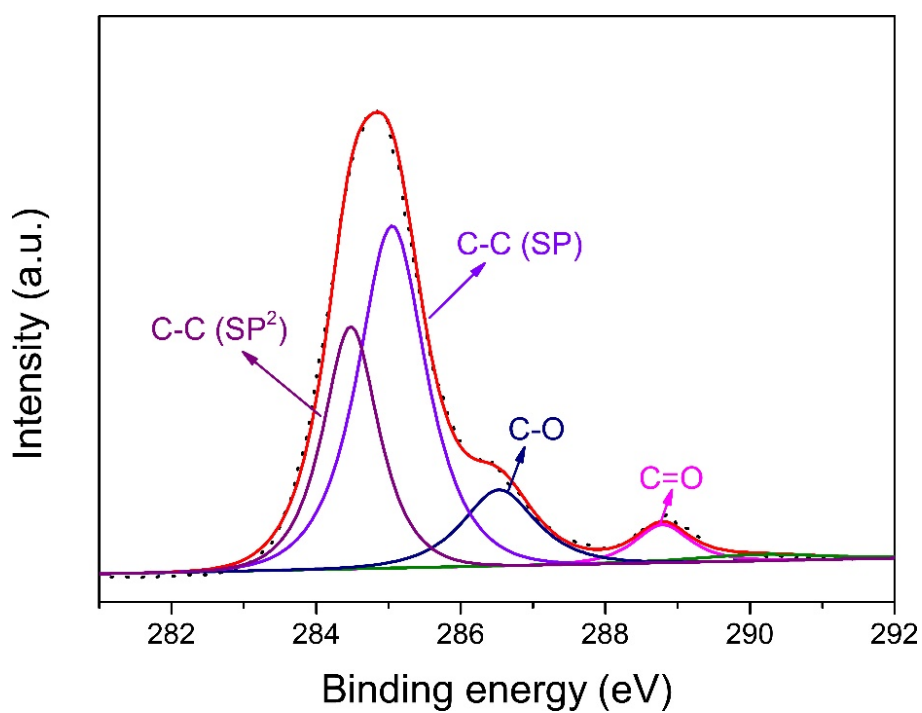

Figure S4. High-resolution XPS spectra of C 1s for GDY.

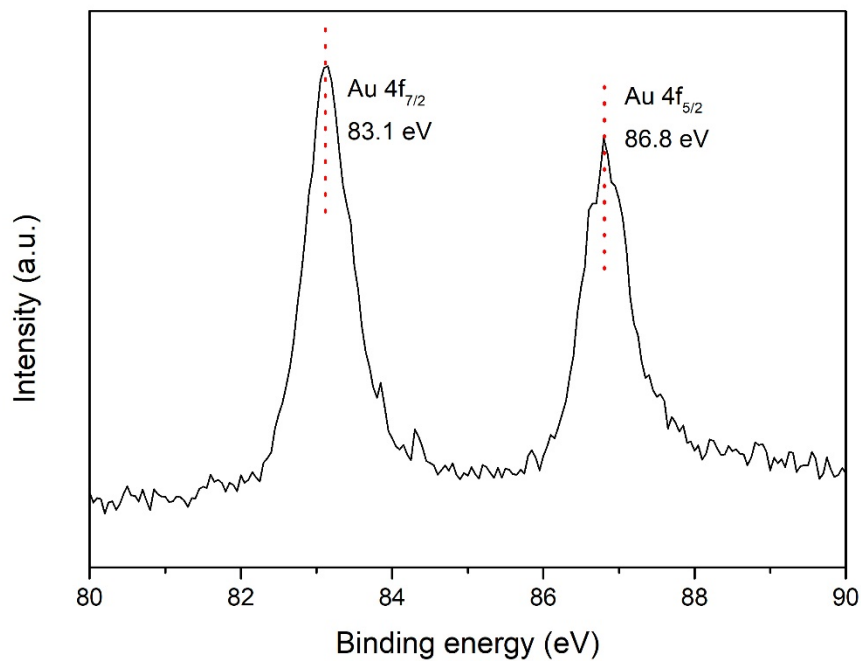

Figure S5. High-resolution XPS spectra of Au 4f for Au/GO

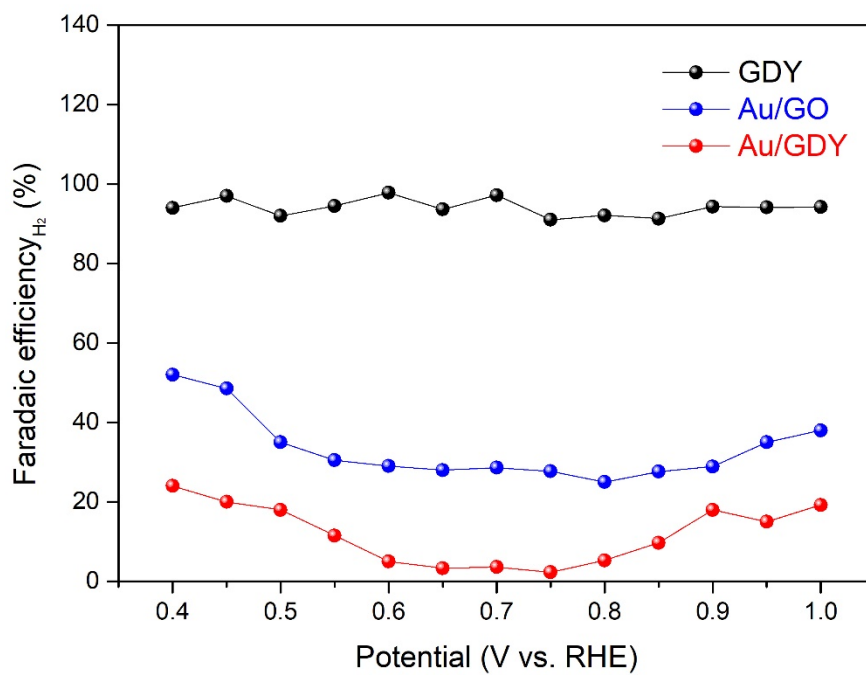

Figure S6. FE<sub>H<sub>2</sub></sub> of GDY, Au/GO and Au/GDY

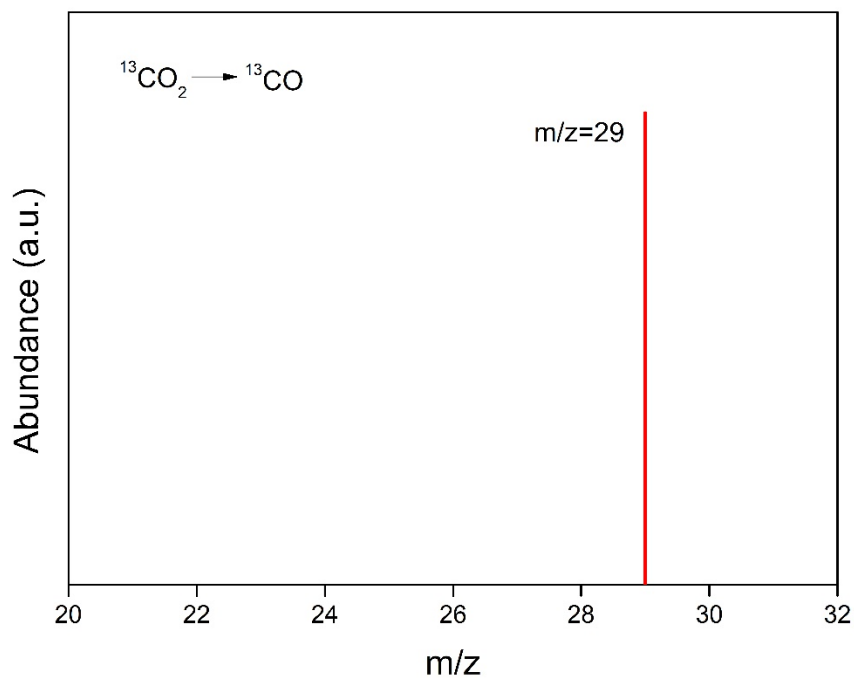

Figure S7. GC-MS result of  $^{13}\text{CO}$  produced over Au/GDY from  $^{13}\text{CO}_2$  isotope experiment

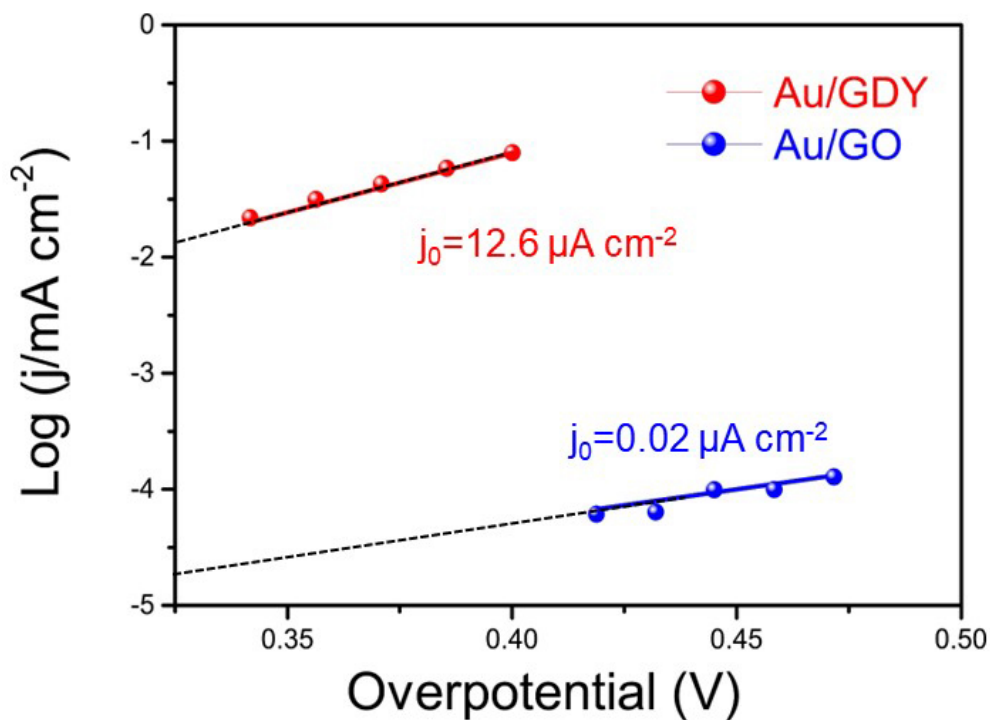

Figure S8. Exchange current density ( $j_0$ ) of Au/GDY and Au/GO

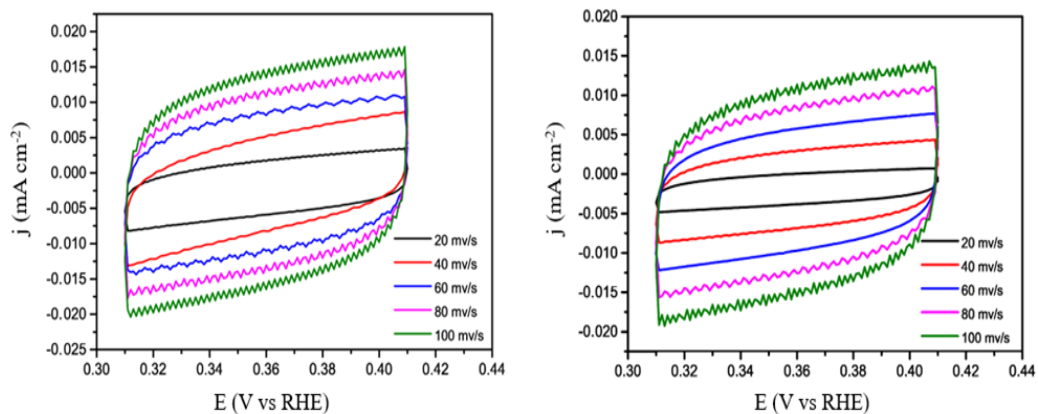

Figure S9. Typical cyclic voltammograms at different scan rates. Au/GDY (left) and Au/GO (right) with scan rates ranging from 20 mV s<sup>-1</sup> to 100 mV s<sup>-1</sup>.

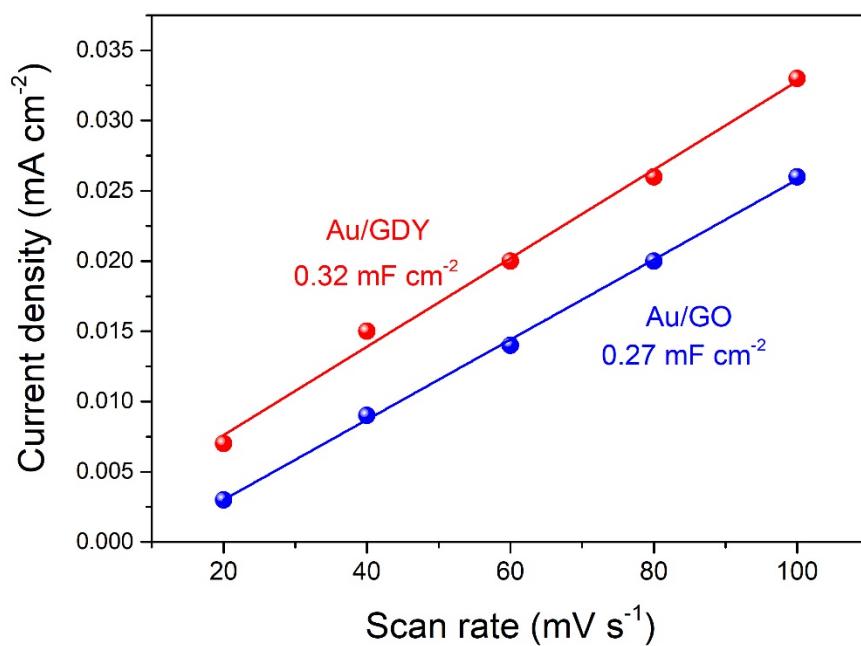

Figure S10. The capacitive currents as a function of scan rates

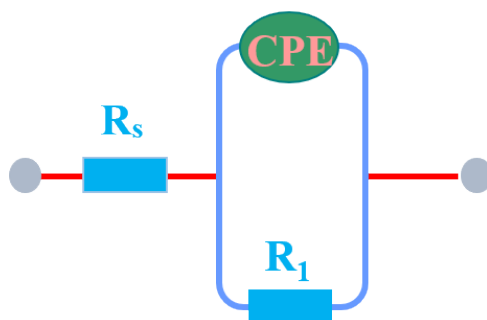

Figure S11. The equivalent circuit model of Au/GDY

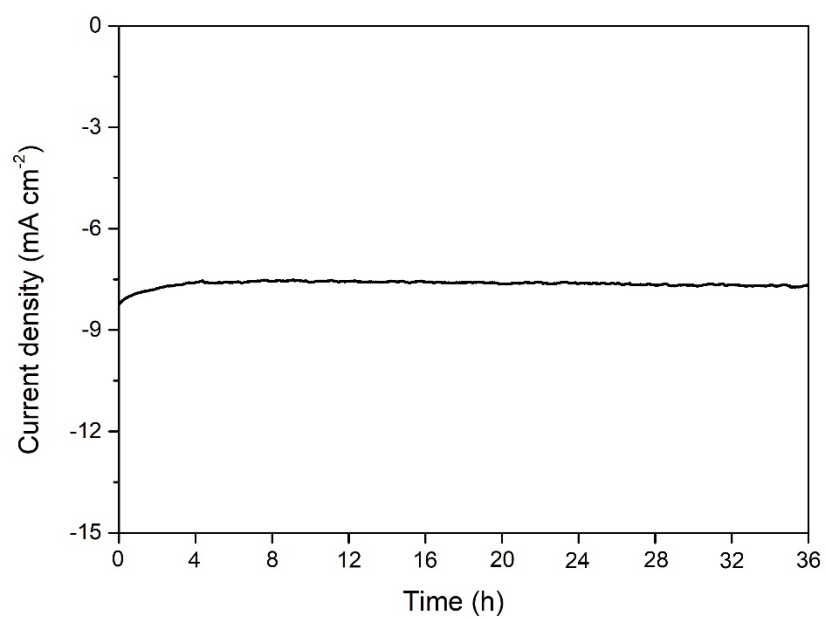

Figure S12. The time-dependent current density curve of Au/GDY at  $-0.75$  V

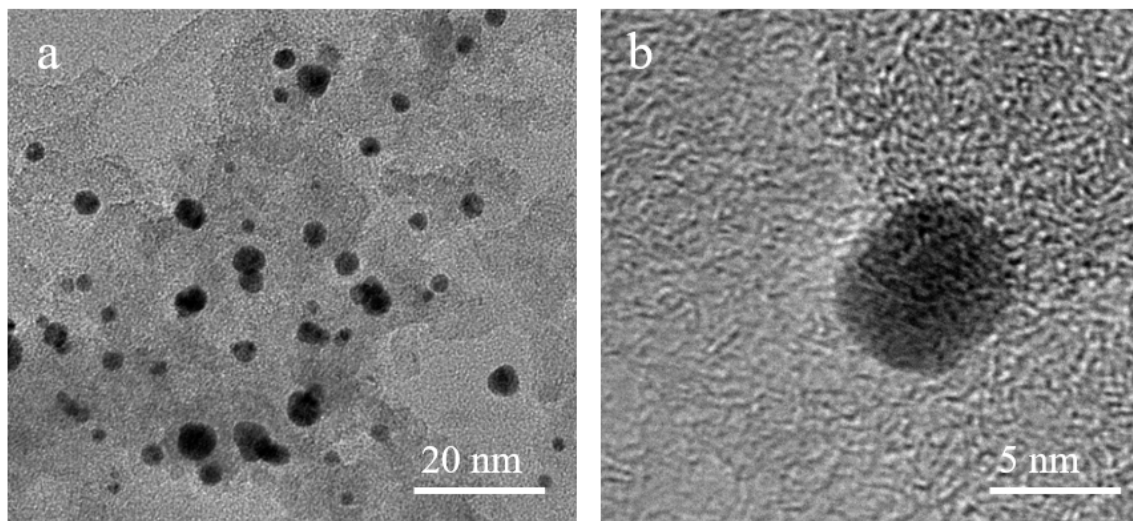

Figure S13. TEM images of Au/GDY after stability test

Table S1. Au loading and ECSA for Au/GDY and Au/C

|           | Au/GDY | Au/C |
|-----------|--------|------|
| Au (wt.%) | 28     | 25   |

Table S2. Summary of Au electrocatalysts studied for electrochemical reduction of CO<sub>2</sub> to CO

| Catalyst                         | Electrolyte             | Potential (V vs. RHE) | FE <sub>CO</sub> | j <sub>CO</sub> (mA cm <sup>-2</sup> ) | Ref       |
|----------------------------------|-------------------------|-----------------------|------------------|----------------------------------------|-----------|
| Au/GDY                           | 0.5 M KHCO <sub>3</sub> | -0.75                 | 94.6%            | 16                                     | This work |
| Au-CeOx/C                        | 0.1 M KHCO <sub>3</sub> | -0.59                 | 72%              | 12.9                                   | [1]       |
| NGQDs-SCAu                       | 0.5 M KHCO <sub>3</sub> | -0.65                 | 91%              | ~11.4                                  | [2]       |
| Au-C <sub>3</sub> N <sub>4</sub> | 0.5 M KHCO <sub>3</sub> | -0.6                  | 91%              | ~9                                     | [3]       |



|                                            |                             |       |     |       |      |
|--------------------------------------------|-----------------------------|-------|-----|-------|------|
| Au-CDots-<br>C <sub>3</sub> N <sub>4</sub> | 0.5 M<br>KHCO <sub>3</sub>  | -0.6  | 75% | 4.8   | [4]  |
| Au-2@CN                                    | 0.5 M<br>KHCO <sub>3</sub>  | -0.58 | 88% | 1.06  | [5]  |
| 8 nm Au<br>NPs                             | 0.5 M<br>KHCO <sub>3</sub>  | -0.67 | 90% | NA    | [6]  |
| Au-Cb NPs                                  | 0.1 M<br>KHCO <sub>3</sub>  | -0.57 | 83% | ~9.5  | [7]  |
| AuNPs/GDL                                  | 0.5 M<br>NaHCO <sub>3</sub> | -0.55 | 77% | ~11.6 | [8]  |
| AuNP GNR                                   | 0.5 M<br>NaHCO <sub>3</sub> | -0.57 | 90% | NA    | [9]  |
| Au/Py-<br>CNTs-O                           | 0.1 M<br>KHCO <sub>3</sub>  | -0.58 | 93% | ~6.5  | [10] |

- [1] D. Gao, Y. Zhang, Z. Zhou, F. Cai, X. Zhao, W. Huang, Y. Li, J. Zhu, P. Liu, F. Yang, G. Wang, X. Bao, *J. Am. Chem. Soc.*, 2017, **139**, 5652-5655.
- [2] J. Fu, Y. Wang, J. Liu, K. Huang, Y. Chen, Y. Li, J. Zhu, *ACS Energy Lett.*, 2018, **3**, 946-951.
- [3] L. Zhang, F. Mao, L. Zheng, H. Wang, X. Yang, H. Yang, *ACS Catal.*, 2018, **8**, 11035-11041.
- [4] S. Zhao, Z. Tang, S. Guo, M. Han, C. Zhu, Y. Zhou, L. Bai, J. Gao, H. Huang, Y. Li, Y. Liu, Z. Kang, *ACS Catal.*, 2017, **8**, 188-197.
- [5] L. Jin, B. Liu, P. Wang, H. Yao, L. A. Achola, P. Kerns, A. Lopes, Y. Yang, J. Ho, A. Moewes, *Nanoscale*, 2018, **10**, 14678-14686.
- [6] W. Zhu, R. Michalsky, O. Metin, H. Lv, S. Guo, C. J. Wright, X. Sun, A. A. Peterson, S. Sun, *J. Am. Chem. Soc.*, 2013, **135**, 16833-16836.
- [7] Z. Cao, D. Kim, D. Hong, Y. Yu, J. Xu, S. Lin, X. Wen, E. M. Nichols, K. Jeong, J. A. Reimer, P. Yang, C. J. Chang, *J. Am. Chem. Soc.*, 2016, **138**, 8120-8125.
- [8] T. N. Huan, P. Prakash, P. Simon, G. Rousse, X. Xu, V. Artero, E. Gravel, E. Doris, M. Fontecave, *ChemSusChem*, 2016, **9**, 2317-2320.
- [9] C. Rogers, W. S. Perkins, G. Veber, T. E. Williams, R. R. Cloke, F. R. Fischer, *J. Am. Chem. Soc.*, 2017, **139**, 4052-4061.

[10] Z. Q. Ma, C. Lian, D. F. Niu, L. Shi, S. Z. Hu, X. S. Zhang, H. L. Liu, *ChemSusChem*, 2019, **12**, 1724.
